# Supplementary material for: Improving the inspection and manual cleaning of dental instruments in a dental hospital
Source: PubMed Central journal article supplement — BMJ Qual Improv Rep. 2016 Jan 14;5(1):u205075.w2305. doi: 10.1136/bmjquality.u205075.w2305 (PMC4752716; doi:10.1136/bmjquality.u205075.w2305), 2016-01-14

## Audit of Hand Instrument Kits RESULT

### 1. Summary

| Condition of instrument(s)                           | Number of feedbacks received | Percentage (%) |
|------------------------------------------------------|------------------------------|----------------|
| Free from cement etc.                                | 88                           | 63.3           |
| Not free from cement etc. (specified instrument)     | 47                           | 33.8           |
| Not free from cement etc. (not specified instrument) | 4                            | 2.9            |
| <b>TOTAL NUMBER OF FEEDBACKS RECEIVED</b>            | <b>139</b>                   | <b>100.0</b>   |

### Audit of Hand Instrument Kits

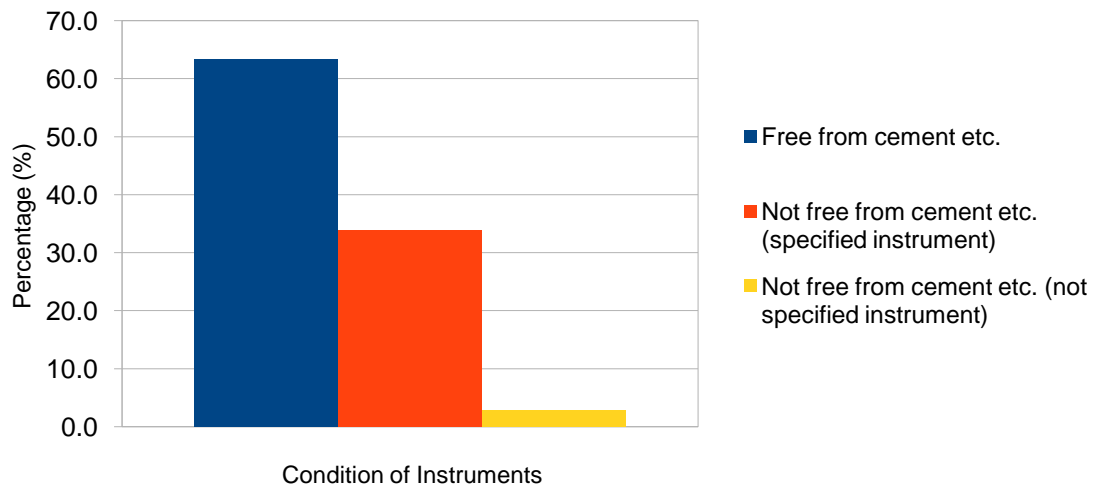

## 2. Type of Instrument NOT Free From Cement

| Type of Instrument      | Number    | Percentage (%) |
|-------------------------|-----------|----------------|
| Flat Plastic            | 27        | 42.9           |
| Excavator (small/large) | 12        | 19.0           |
| Burnisher               | 10        | 15.9           |
| Thymosin probe          | 7         | 11.1           |
| Dental mirror           | 2         | 3.2            |
| Crown prep kit          | 1         | 1.6            |
| Briault probe           | 1         | 1.6            |
| Ceramic carver          | 1         | 1.6            |
| Rubber dam clamp        | 1         | 1.6            |
| Plugger                 | 1         | 1.6            |
| <b>TOTAL</b>            | <b>63</b> | <b>100.0</b>   |

Type of Instrument NOT Free From Cement

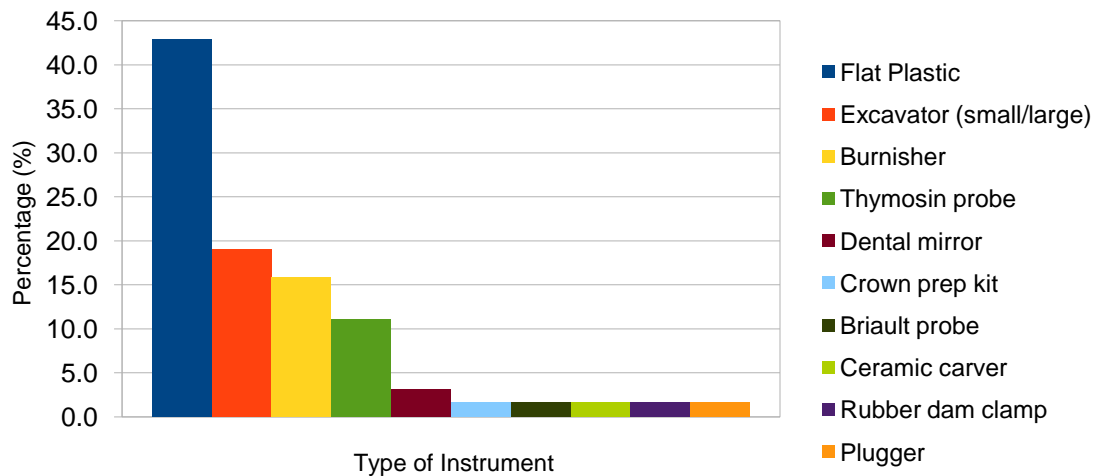

Supplement: bmjqir-5-u205075-w2305-s1.pdf [file bmjqir-5-u205075-w2305-s1.pdf]
