# Supplementary material for: Improving the inspection and manual cleaning of dental instruments in a dental hospital
Source: PubMed Central journal article supplement — BMJ Qual Improv Rep. 2016 Jan 14;5(1):u205075.w2305. doi: 10.1136/bmjquality.u205075.w2305 (PMC4752716; doi:10.1136/bmjquality.u205075.w2305), 2016-01-14
Supplement: bmjqir-5-u205075-w2305-s2.pdf [file bmjqir-5-u205075-w2305-s2.pdf]

# MANUAL CLEANING of INSTRUMENTS

## THE PROBLEM

- Kits are being returned to the Dental Hospital with cement still contaminating instruments.
- CSSD do not carry out manual cleaning.

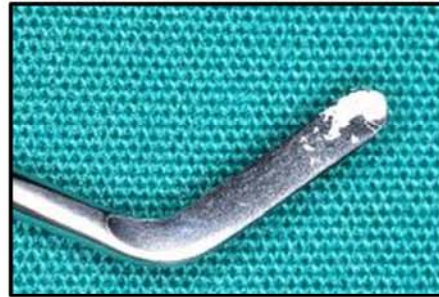

## WHAT CAN WE DO?

## WHY?

- Cross infection risk
- Compromised patient care, and increased costs

Manually clean our instruments before returning them to the trolley

**IT IS YOUR OWN RESPONSIBILITY TO CARRY THIS OUT.**

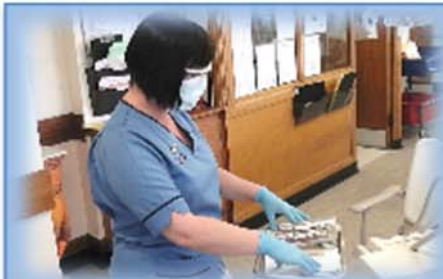

Ensure you are wearing your personal protective equipment (glasses, mask and gloves)

Inspect all instruments in your kit for contamination after use.

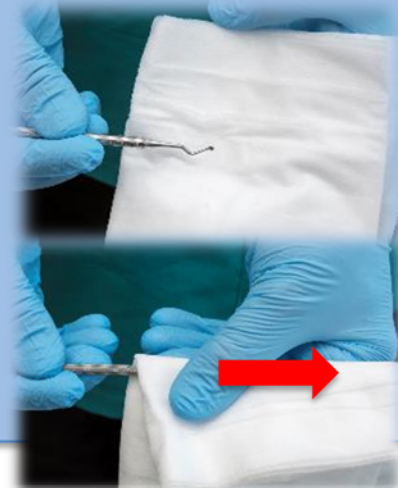

If found, first use a detergent wipe, ensuring the wiping action is in one direction only, away from any part likely to pose a risk of a stick injury

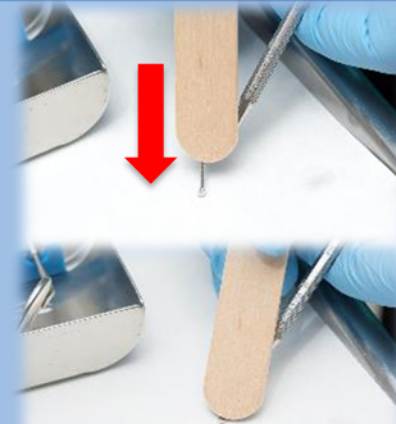

If cement still present, then hold the instrument so the tip is in contact with the top of the bracket table, then use a wooden spatula to remove the cement

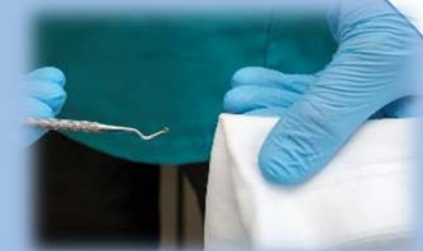

Wipe again with a detergent wipe, and re-inspect

**If cement cannot be removed by this method, dispose of the instrument in a sharps bin**
