# Supplementary material for: Improving the inspection and manual cleaning of dental instruments in a dental hospital
Source: PubMed Central journal article supplement — BMJ Qual Improv Rep. 2016 Jan 14;5(1):u205075.w2305. doi: 10.1136/bmjquality.u205075.w2305 (PMC4752716; doi:10.1136/bmjquality.u205075.w2305), 2016-01-14

No. of contaminated instruments

Inspection and Manual Cleaning of Contaminated Dental Instruments

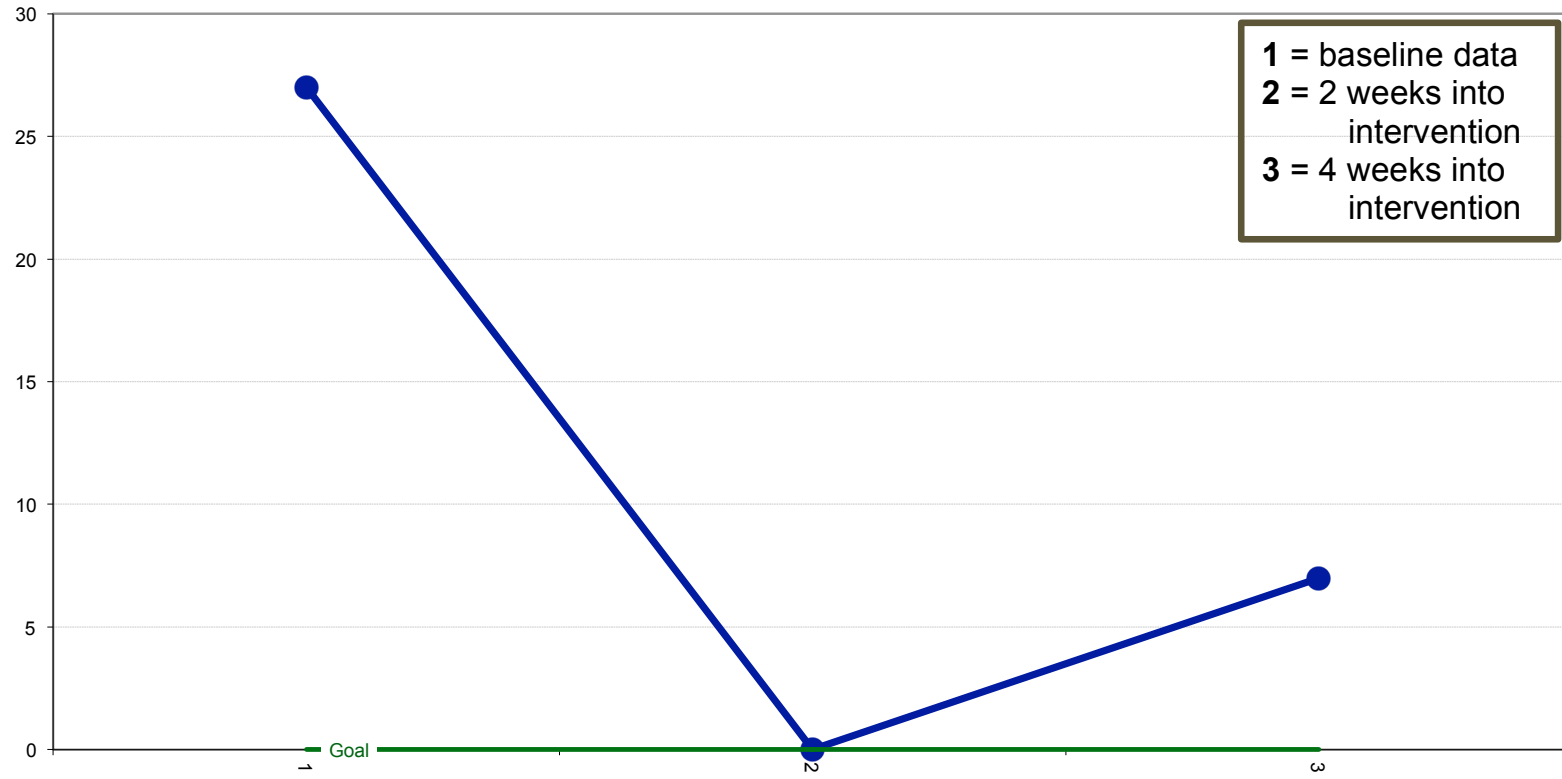

1 = baseline data  
2 = 2 weeks into intervention  
3 = 4 weeks into intervention

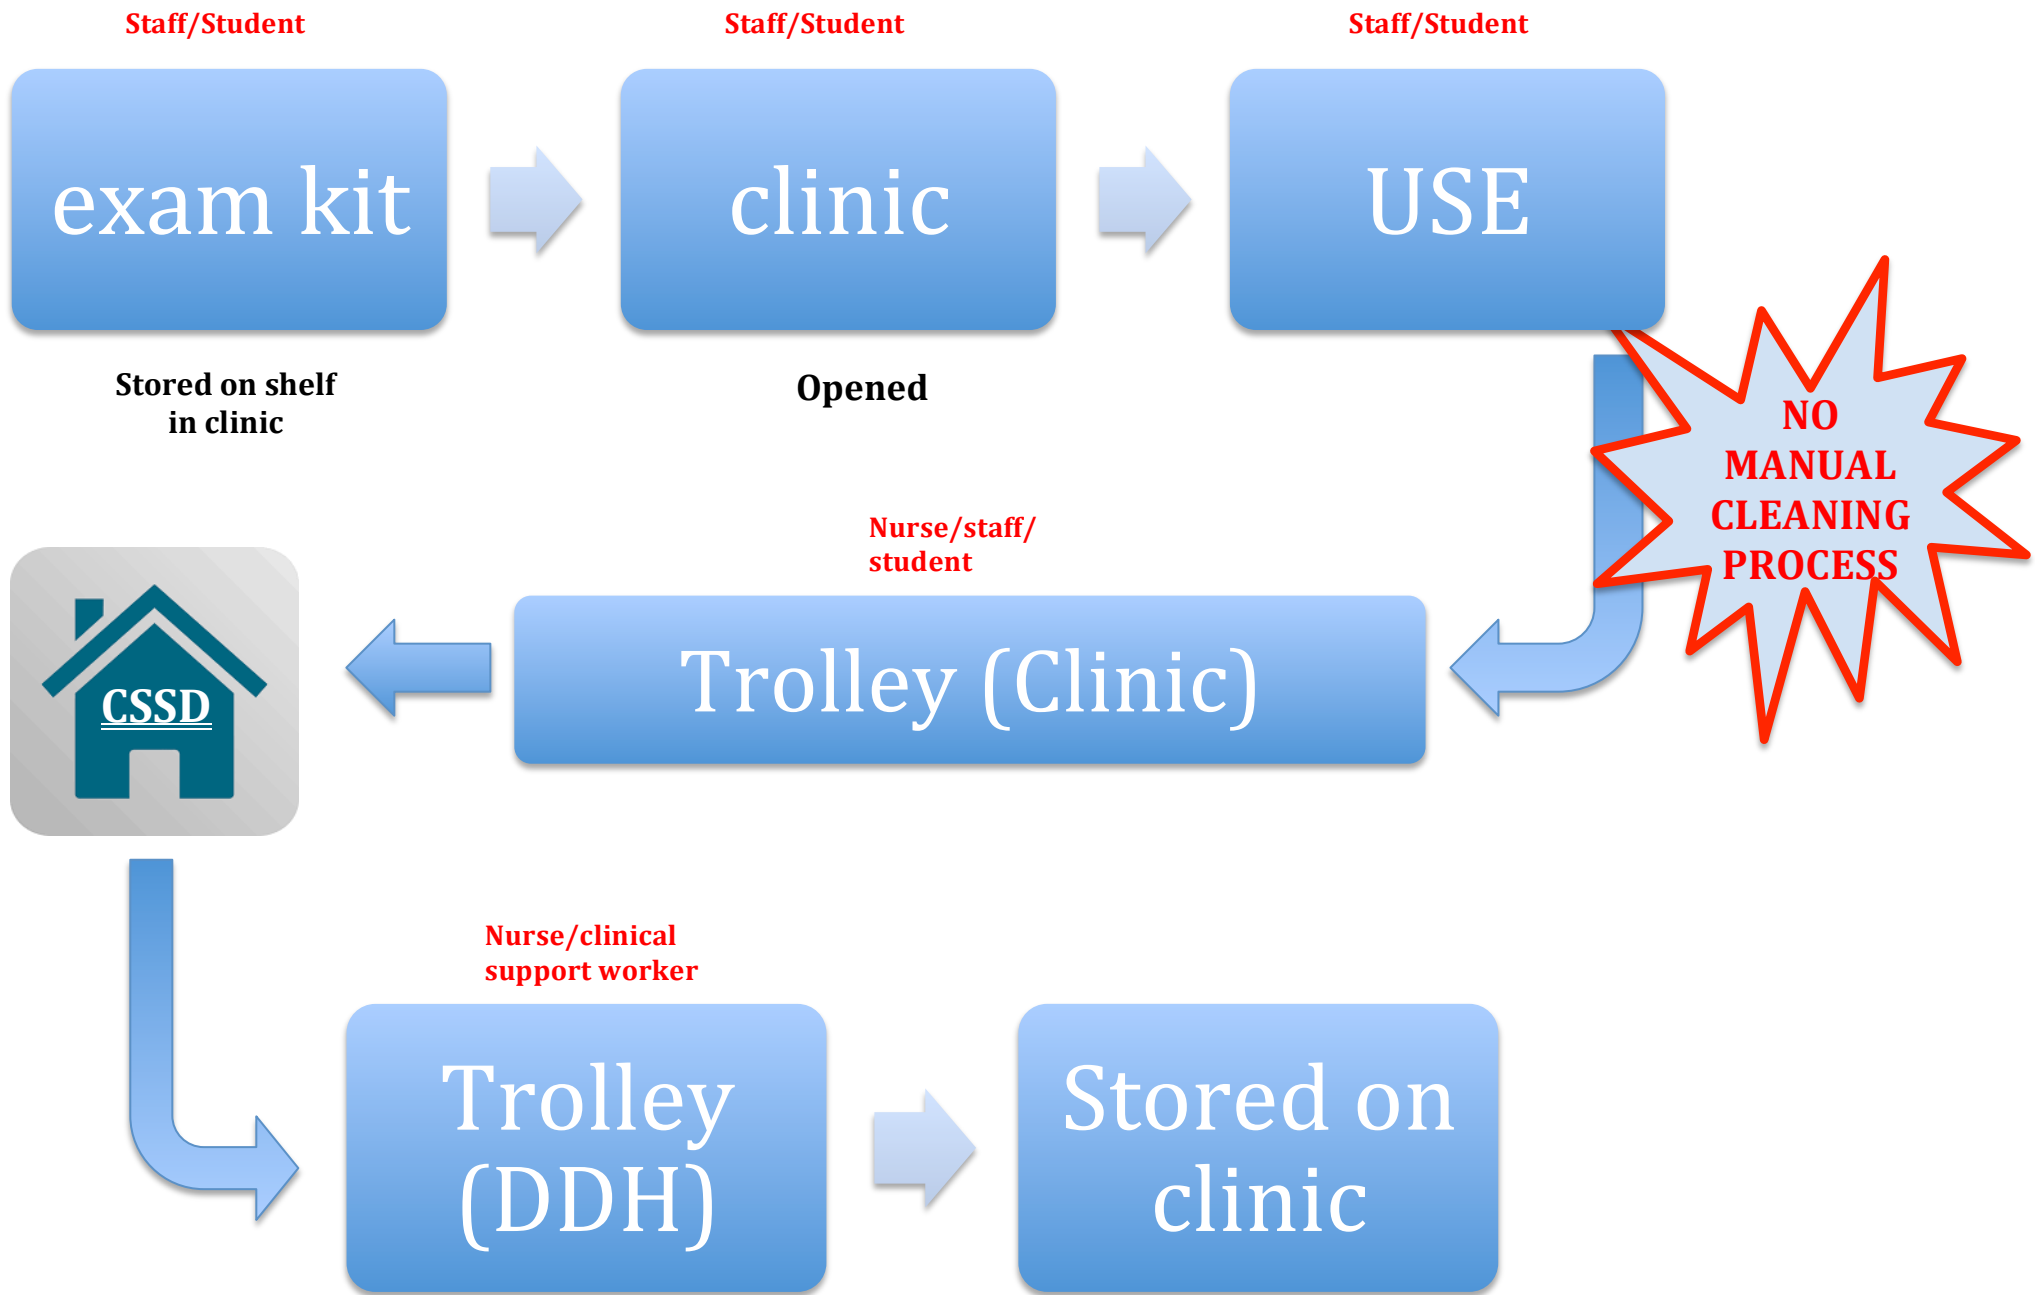

Supplement: bmjqir-5-u205075-w2305-s3.pdf [file bmjqir-5-u205075-w2305-s3.pdf]
