# Supplementary material for: Improving the inspection and manual cleaning of dental instruments in a dental hospital
Source: PubMed Central journal article supplement — BMJ Qual Improv Rep. 2016 Jan 14;5(1):u205075.w2305. doi: 10.1136/bmjquality.u205075.w2305 (PMC4752716; doi:10.1136/bmjquality.u205075.w2305), 2016-01-14
Supplement: bmjqir-5-u205075-w2305-s4.pdf [file bmjqir-5-u205075-w2305-s4.pdf]

Reducing contaminated instruments due to residual cement, and the impact this has on patient care:

1. When you opened your kit, were any of the instruments contaminated with residual cement?

Yes / No

2. If yes, what instrument(s) was/were contaminated?
  3. Did you feel this had an impact on treatment of the patient?
- 

Reducing contaminated instruments due to residual cement, and the impact this has on patient care:

1. When you opened your kit, were any of the instruments contaminated with residual cement?

Yes / No

2. If yes, what instrument(s) was/were contaminated?
  3. Did you feel this had an impact on treatment of the patient?
- 

Reducing contaminated instruments due to residual cement, and the impact this has on patient care:

1. When you opened your kit, were any of the instruments contaminated with residual cement?

Yes / No

2. If yes, what instrument(s) was/were contaminated?
3. Did you feel this had an impact on treatment of the patient?
